1 Interactions between Trypillian farmers and North Pontic forager-  
2 pastoralists in Eneolithic central Ukraine

3

4 Alexey G. Nikitin<sup>1\*</sup>, Mykhailo Videiko<sup>2</sup>, Nick Patterson<sup>3</sup>, Virginie Renson<sup>4</sup>, David Reich<sup>3,5</sup>

5

6 **Author affiliations**

7

8 <sup>1</sup>Department of Biology, 1 Campus Drive, Grand Valley State University, Allendale, MI, 49401,  
9 USA, [nikitin@gvsu.edu](mailto:nikitin@gvsu.edu)

10 <sup>2</sup>Scientific Research Laboratory of Archaeology, Borys Grinchenko Kyiv University, Bulvarno-  
11 Kudriavska St, 18/2, Ukraine, [my.videiko@kubg.edu.ua](mailto:my.videiko@kubg.edu.ua)

12 <sup>3</sup>Broad Institute of Harvard and MIT, Cambridge, MA, 02142, USA and Department of Human  
13 Evolutionary Biology, Harvard University, Cambridge, MA 02138, USA,  
14 [nickp@broadinstitute.org](mailto:nickp@broadinstitute.org)

15 <sup>4</sup>University of Missouri Research Reactor, 1513 Research Park Drive, Columbia, MO 65201, USA,  
16 [rensonv@missouri.edu](mailto:rensonv@missouri.edu)

17 <sup>5</sup>Department of Genetics, Harvard Medical School, Boston, MA 02115; Broad Institute of  
18 Harvard and MIT, Cambridge, MA, 02142, USA; Department of Human Evolutionary Biology,  
19 Harvard University, Cambridge, MA 02138, USA; Howard Hughes Medical Institute, Harvard  
20 Medical School, Boston, MA 02115, USA [reich@genetics.med.harvard.edu](mailto:reich@genetics.med.harvard.edu)

21 \* Corresponding author, Department of Biology, 1 Campus Drive, Grand Valley State University,  
22 Allendale, MI, 49401, USA, [nikitin@gvsu.edu](mailto:nikitin@gvsu.edu)

23

24

25 **Key words:** Eneolithic, Pre-Cucuteni-Cucuteni-Trypilia complex, Sredny Stog, stable isotope  
26 analysis, ancient DNA, genetic ancestry, Cucuteni C pottery, circum-Pontic trade network,  
27 individual life history

28 **Abstract**

29 The establishment of agrarian economy in Eneolithic East Europe is associated with the Pre-  
30 Cucuteni-Cucuteni-Trypillia complex (PCCTC). PCCTC farmers interacted with Eneolithic forager-  
31 pastoralist groups of the North Pontic steppe as PCCTC extended from the Carpathian foothills  
32 to the Dnipro Valley beginning in the late 5<sup>th</sup> millennium BCE. While the cultural interaction  
33 between the two groups is evident through the Cucuteni C pottery style that carries steppe  
34 influence, the extent of biological interactions between Trypillian farmers and the steppe  
35 remains unclear. Here we report the analysis of artefacts from the late 5<sup>th</sup> millennium Trypillian  
36 site of Kolomyitsiv Yar Tract (KYT) in central Ukraine, focusing on a bone fragment found in the  
37 Trypillian context at KYT. Diet stable isotope ratios obtained from the bone fragment place the  
38 diet of the KYT individual within the range of forager-pastoralists of the North Pontic area.  
39 Strontium isotope ratios of the KYT individual are consistent with having originated from  
40 contexts of the Sredny Stog culture sites of the Middle Dnipro Valley. Genetic analysis of the  
41 KYT individual indicates ancestry derived from a proto-Yamna population such as Sredny Stog.  
42 Overall, the KYT archaeological site presents evidence of interactions between Trypillians and  
43 Eneolithic Pontic steppe inhabitants of the Sredny Stog horizon and suggests a potential for  
44 gene flow between the two groups as early as the beginning of the 4<sup>th</sup> millennium BCE.

## 45 **Introduction**

46

47 Trypillian culture (5000-2750 BCE) is the eastern component of the Pre-Cucuteni-Cucuteni-  
48 Trypillia complex (PCCTC) of Eneolithic farmers of eastern Europe. PCCTC extended from the  
49 Carpathian Mountains to the Dnipro (Dnieper) River in what is now Moldova, Romania and  
50 Ukraine. PCCTC is known by over 4300 settlements and cemeteries. In the 5<sup>th</sup> millennium BCE  
51 PCCTC was synchronous with such European Neolithic complexes as Lengyel, Vinca, and  
52 Kodjadermen-Gumelnița-Karanovo VI (K GK). In the east, Trypillia, the Ukrainian branch of  
53 PCCTC, neighbored the Dnipro-Donets and Pit-Comb Ware fisher-forager groups, as well as the  
54 Sredny Stog forager-pastoralists. The Sredny Stog archaeological horizon formed in the steppe  
55 of Azov, between the Dnipro and the Don Rivers, in the 5<sup>th</sup> millennium BCE. It existed, in various  
56 cultural forms, through the end of the 4<sup>th</sup> millennium BCE (Kotova 2013). The Yamma cultural  
57 complex took over the steppe dominance from Sredny Stog at the end of the 4<sup>th</sup> millennium  
58 BCE. Sredny Stog has been hypothesized to be the ancestral group from which the Yamna  
59 complex emerged. Sredny Stog and Yamna are viewed as an Eneolithic-Bronze Age cultural  
60 continuum that was an important source for the spread of Indo-European cultural traits across  
61 a much larger geographic region beginning in the Bronze Age (Telegin 1986).

62

63 Close contacts between Trypillia and Sredny Stog began as early as the end of the Trypillia A  
64 period (ca. 4700-4600 BCE) and continued throughout the Eneolithic (Kotova 2013).  
65 Archaeological evidence shows reciprocal influence of Sredny Stog and Trypillia on each other's  
66 cultural development. Settlements of the Deriivka group of the Sredny Stog horizon such as  
67 Deriivka II and Molyukhiv Bugor contain evidence of agricultural practices, likely influenced by  
68 the neighboring Trypillian groups (Kotova 2013). The influence of Sredny Stog on Trypillian  
69 culture is most evident in the presence of Sredny Stog ceramic motifs in Trypillian pottery.

70

71 Archaeology and genetics point to the modern-day territory of Romania as the origin of PCCTC.  
72 Trypillian individuals from the Verteba Cave ritual site in western Ukraine share their genetic  
73 ancestry with the Eneolithic individuals of the Bodrogkeresztúr culture from Urziceni in

74 southeast Muntenia (Mathieson *et al.* 2018). Trypillians maintained close genetic links with the  
75 farming communities of the Balkans through the end of the PCCTC existence (Immel *et al.*  
76 2020). Archaeological studies link the origins of PCCTC with western Transylvania (Burdo 2002).

77

78 Early Trypillian sites appear in the middle Dniester area at the beginning of the 5<sup>th</sup> millennium  
79 BCE, putatively reflecting eastward migration of pre-Cucuteni groups from pre-Carpathian  
80 Moldova (Burdo 2004). A plausible reason behind such a migration was climate change  
81 necessitating the exploration of new territories for arable lands. This migration has been  
82 reconstructed as having taken place in several waves. Early Trypillians, having inherited the  
83 cultural and economic adaptations of the late Neolithic cultures of the Carpathian-Danube  
84 basin, managed to significantly expand the domain of ancient agricultural societies. These early  
85 east European agrarians established the basis for the formation of what Ukrainian  
86 archaeologists refer to as the Trypillian civilization between the Dniester and the Dnipro during  
87 the second half of the 5<sup>th</sup> millennium through the end of the 4<sup>th</sup> millennium BCE (Videiko 2004).

88

89 After 4500 BCE Trypillia split into several local groups, distinguished by the style of their  
90 ceramics. The emergence of Cucuteni A-B - Trypillia BI-II is likely connected with the movement  
91 of PCCTC groups out of the overpopulated Carpathian region into the forest-steppe expanses of  
92 the Dniester-Dnipro interfluvium. Trypillians reached the Dnipro Valley in the second half of the  
93 5<sup>th</sup> millennium BCE. Several local Trypillian types are recognized during this period,  
94 distinguished by material culture and features of the economy. While these groups functioned  
95 autonomously, there is evidence for active interaction among them as well as with Trypillian  
96 groups to the west (Videiko & Burdo 2020). The transition to the open expanses of the Dnipro  
97 Valley also brought Trypillian groups into direct contact with steppe populations.

98

99 During the Trypillia BI-II stages, painted ceramics dominated in the western part of the  
100 expanding Trypillian domain, while the ceramics with grooved/incised décor dominated in the  
101 east. The eastern part of the Trypillian domain also adopted elements of pottery traditions from  
102 the steppe groups of the Sredny Stog cultural horizon in their kitchen pottery. Trypillian

103 kitchenware is distinctive from other ceramic types by the composition of clay, which  
104 occasionally included crushed river shells, as well as by the shape of vessels (pots and bowls)  
105 and the method of applying ornamental compositions using stamping such as imprints of comb  
106 and pits (Figures S3, S4). This kitchenware ceramic style is known as the “Cucuteni C” type.  
107 Cucuteni C ceramics is considered an indicator of the steppe influence on Trypillian ceramics  
108 (Burdo 2016).

109  
110 Around 4300 BCE, the Penezhkovska-Scherbanevska local Trypillian group was formed in the  
111 middle Dnipro Valley. The group is represented by about ten settlements, of which the two  
112 largest ones are the eponymic settlement near the village of Trypillia, over 60 hectares in size,  
113 and the Kolomyitsiv Yar Tract (KYT) near the village of Kopachiv (around 15 hectares) (Videiko &  
114 Burdo 2018) (Figure 1). Recent excavations at KYT revealed Cucuteni C ceramics in the pottery  
115 assemblage. In addition, a human long bone fragment was uncovered at the site in the  
116 Trypillian cultural layer. The presence of Cucuteni C pottery at KYT presents an opportunity to  
117 study the KYT site in the context of Sredny Stog cultural influences on Trypillia. The human  
118 osteological specimen uncovered at KYT allows the examination of diet and mobility, as well as  
119 the analysis of genetic affinities of the KYT population. In the present study, we set out to test  
120 the hypothesis of the existence of genetic interactions alongside cultural exchanges between  
121 Trypillia and Sredny Stog at Trypillian sites containing Cucuteni C pottery. Finds of human  
122 remains at Trypillian sites are exceedingly rare (Nikitin *et al.* 2010, 2017b). The osteological  
123 specimen from KYT provides exceptional opportunity to expand our understanding of  
124 subsistence patterns, mobility, and genetic landscape of the area to the south of the Carpathian  
125 Mountains during the Eneolithic.

126  
127  
128  
129  
130  
131

132 **Materials and Methods**

133

134 Kolomyitsiv Yar Tract site description

135

136 Within the modern limits of the Kyiv Region, more than two dozen settlements of stage BI-II are  
137 now known. Trypillian settlements of this period, in comparison with those of the later stages  
138 BII, CI and CII, are among the least studied in central Ukraine. The settlement at the Kolomyitsiv  
139 Yar Tract (KYT) is one of the easternmost among the Trypillian sites in the northern part of this  
140 region.

141

142 Kolomyitsiv Yar Tract (50.10799, 30.52610) is situated in a valley, southeast of the village of  
143 Kopachiv, Obukhiv District, Kyiv Region (Figure 1). A stream, which is the west tributary of the  
144 Stugna River, flows southwest-northeast along the bottom of the valley (Figure S5). The left,  
145 sloping bank of the stream is occupied by farm fields. The steep right bank of the stream is  
146 partially overgrown with forest. The floodplain of the stream is marshy, has a width of 100 to  
147 50-30 m, and is partially overgrown with reeds (Figures 2, S2).

148

149 The KYT archaeological site was discovered in 2005 (Kvitnitskiy 2006). It was further excavated  
150 by a joint expedition of the Kyiv Regional Archaeological Museum and the Institute of  
151 Archeology of the National Academy of Sciences of Ukraine in 2006 (Videiko *et al.* 2007), 2007  
152 (led by Maxim Kvitnicky), and 2011 (Videiko 2012). These were rescue excavations since part of  
153 the site's cultural layer was being actively destroyed by the extraction of topsoil (chernozem) in  
154 the floodplain of a stream along which the site's Trypillian structures were found. The site is  
155 multi-layered and includes materials from the Trypillian culture (stage BI-II), the early Iron Age,  
156 and the Medieval periods (XII-XIII centuries). Archaeological monuments, later in time than the  
157 Trypillian culture, were located in the lower part of the valley, in a 70-100 m strip along the  
158 right bank of the stream.

159

160 In cooperation with the Christian-Albrecht University, the “Human Development in Landscapes”  
161 School (Kiel, Germany), a magnetic survey was carried out on a part of the KYT’s Trypillian  
162 settlement in 2016. The survey covered about three hectares of an area of the slope of the  
163 promontory in the lower part of the valley (Videiko *et al.* 2017). As a result, underground  
164 anomalies corresponding to the remains of 19 incinerated buildings of the Trypillian culture and  
165 traces of six pits of various sizes were found (*ibid.*, Fig. 1). The survey determined that the  
166 anomalies were of varying preservation - from good to severely destroyed by plowing and  
167 erosion, especially those located in areas with a considerable slope of the terrain. Field  
168 excavations confirmed the results of the magnetic survey both regarding the presence and  
169 preservation of the underground features.

170  
171 Underground features representing remains of buildings were located in three rows on the  
172 sloped terrain along the stream flowing along the bottom of the valley. The top row contained  
173 the remains of 11 buildings. The second row contained the remains of five structures, and the  
174 bottom row had three. Probably most of the remains of the buildings on this site were located  
175 outside the field, where some building remains were surveyed in 2005-2007. Pit anomalies  
176 were identified near the remains of buildings. The largest pit was located opposite the end of a  
177 building under excavation 14, which also stood out for its size. The pit’s location suggests that  
178 originally these pits were used for clay extraction during dwelling construction by Trypillians.

179  
180 In the heavily disturbed area of the topsoil extraction, a human long bone fragment (possibly a  
181 humerus shaft, Figure S1) was discovered in 2007. The bone fragment was found in the  
182 proximity of a burnt house (“*ploschadka*”) of Trypillian culture, explored during excavations in  
183 2007.

#### 184 185 Radiocarbon dating and diet stable isotope analysis

186 Radiocarbon dating using Accelerated Mass Spectrometry (AMS) as well as carbon and nitrogen  
187 ( $\delta^{13}\text{C}$  and  $\delta^{15}\text{N}$ ) stable isotope analyses were carried out at BETA Analytic, Miami, FL. Stable  
188 isotope measurements were obtained using a modified version of the Longin collagen

189 extraction method (Longin 1971). Radiocarbon calibration was carried out using OxCal version  
190 4.4 and the IntCal 20 calibration curve (Bronk Ramsey 2009; Reimer *et al.* 2020). Stable isotope  
191 analysis of carbon and nitrogen is used in archaeological investigations to examine dietary  
192 patterns. Carbon isotope ratio,  $\delta^{13}\text{C}$ , is a measure of the ratio of the stable isotopes of carbon,  
193  $^{13}\text{C}$  and  $^{12}\text{C}$ . Carbon isotope ratios are measured on bone collagen and dentin, which makes it  
194 possible to determine the origin of dietary proteins from marine, terrestrial and freshwater  
195 resources. Within the terrestrial sources,  $\delta^{13}\text{C}$  makes it possible to differentiate between the C3  
196 and C4 plant-based diets (Schwarcz & Schoeninger 1991). Nitrogen isotope ratio,  $\delta^{15}\text{N}$ , is the  
197 ratio of stable isotopes of nitrogen,  $^{15}\text{N}$  and  $^{14}\text{N}$ . The evaluation of  $\delta^{15}\text{N}$  makes it possible to  
198 determine the trophic level of the studied organism within a food web. Populations of different  
199 subsistence strategies can be distinguished by their stable isotope signature (Schwarcz &  
200 Schoeninger 1991).

201

#### 202 Strontium isotope analysis

203 Strontium isotope ratio analysis of the KYT bone and soil specimens was carried out at the  
204 University of Missouri Research Reactor (MURR). The soil sample was powdered in an agate  
205 mortar and calcined at 550°C for four hours. An aliquot of about 0.1 g was transferred to a PFA  
206 vial and dissolved in 24N HF - 14N HNO<sub>3</sub> (4ml and 1ml, respectively) on a hot plate at 125°C for  
207 48hrs. The solution was then evaporated and the residue re-dissolved in 6ml of 6N HCl at 125°C  
208 for 48hrs. The solution was evaporated at 90°C, and the residue was re-dissolved in 2ml of  $^{14}\text{N}$   
209 HNO<sub>3</sub> at 125°C and evaporated.

210

211 The bone sample was mechanically cleaned using a microdrill equipped with a bristle brush. It  
212 was then chemically cleaned using an ultra-sonic bath and a succession of 0.1N acetic acid for  
213 30 minutes, mQ water for 15 minutes, and 0.1N acetic acid for 15 minutes. The sample was  
214 thoroughly rinsed with mQ water after each cycle. The bone was then leached for seven hours  
215 in 5% acetic acid, rinsed with mQ water, and dried at 105°C in the drying oven. A fragment of  
216 about 40-50 mg was dissolved in a PFA vial using 7N HNO<sub>3</sub> on a hot plate at 110°C for 24hrs.  
217 The solution was then evaporated at 90°C.



218

219 The dry residues of the bone and the soil samples were re-digested in 2ml 7N HNO<sub>3</sub> and the Sr  
220 was extracted using a protocol adapted from (de Muynck *et al.* 2009). The Sr solutions were  
221 evaporated, and the residue dissolved in 0.05N HNO<sub>3</sub> before analysis.

222

223 The Sr isotopic analysis was conducted on a Nu Plasma II (Nu Instruments) multi-collector –  
224 inductively coupled plasma – mass spectrometer in operation at MURR. Both the samples and  
225 the SRM987 Sr isotopic standard solutions were prepared to obtain a Sr concentration of about  
226 150 ppb. The measured ratios were corrected for the isobaric interference of <sup>87</sup>Rb, <sup>86</sup>Kr, and  
227 <sup>84</sup>Kr, and for mass bias using the iterative approach and a value of 0.1194 for <sup>86</sup>Sr/<sup>88</sup>Sr natural  
228 ratio. The SRM987 was measured multiple times (n=11) and the value obtained for the <sup>87</sup>Sr/<sup>86</sup>Sr  
229 were 0.71022 ± 0.00004 (2sd). The values obtained for the samples were corrected by standard  
230 bracketing using the accepted value of 0.710248 for the <sup>87</sup>Sr/<sup>86</sup>Sr (Thirlwall 1991).

231

### 232 Genetic analysis

233

234 We carried out the first steps of ancient DNA analysis in a dedicated clean room at Harvard  
235 Medical School, following previously established protocols to minimize contamination including  
236 working in positively pressured rooms decontaminated with ultraviolet light, and use of  
237 protective clothing by the technicians handling the remains. We took a sample of xx mg of  
238 cortical bone powder using a dental drill. We extracted DNA using a methodology optimized to  
239 retain short and degraded molecules (Dabney *et al.* 2013; Korlević *et al.* 2015; Rohland *et al.*  
240 2018), and converted the extracted DNA into a barcoded, double-stranded library (Rohland &  
241 Reich 2012). We enriched the library in solution for sequences overlapping at least 1.2 million  
242 single nucleotide polymorphisms (Fu *et al.* 2015; Rohland *et al.* 2022). We sequenced on  
243 Illumina instruments using 2x76bp sequences. We processed the data bioinformatically and  
244 mapped to the human reference genome hg19 as described in previous studies, removed  
245 duplicated molecules based on matching barcodes and start and stop position in the mapped  
246 genome (e.g. (Mathieson *et al.* 2015). We represented each targeted position by a single

247 randomly chosen sequence, which produce a total of 357,145 targeted SNPs on chromosomes  
248 covered by at least one sequence. The sequence data gave no evidence of contamination based  
249 on polymorphism in its mitochondrial DNA using contamMix (Fu *et al.* 2013) (the 95%  
250 confidence interval for matching to the consensus haplogroup of U4b1b2 was 98.9-100%) and  
251 had ratio of Y to X chromosome sequences consistent with female molecular sex.

252

## 253 **Results and Discussion**

254

### 255 Ceramic assemblage at Kolomyitsiv Yar Tract

256

257 Detailed analysis of the KYT ceramic assemblage is presented in (Videiko *et al.* 2017). Overall,  
258 Trypillian ceramics at the KYT site belongs to the stage BI-II of Trypillia culture period. The  
259 ceramic assemblage uncovered at the site is typical for this stage in the Middle Dnipro region  
260 and is represented by the so-called “kitchenware” and “tableware” types. A characteristic  
261 feature of the ceramics from KYT is the addition of crushed shells to the clay of some vessels  
262 with a carved ornament, as well as the processing of their inner surface with a tool that leaves  
263 stripes - combs, which is typical for ceramics of the Cucuteni C type (Figures S3, S4). A detailed  
264 comparative analysis of ceramics of the Cucuteni C type from the settlements of Trypillia and  
265 Sredny Stog convincingly shows that Trypillian settlements contain imported (Sredny Stog) and  
266 locally made ceramics with shell admixture (Tsvek & Rassamakin 2002). Finds of Cucuteni C  
267 ceramics at KYT are of local production. Cucuteni C pottery at KYT parallels the Sredny Stog  
268 ceramics of Sredny Stog II, Stril’cha Skelya and Molyukhiv Bugor (Figure S4). The ceramic  
269 assemblage at KYT containing Cucuteni C ceramics made on site suggests the presence of  
270 carriers the Sredny Stog pottery making techniques at KYT.

271

272

273

274

275

276 Absolute dating and dietary isotopes of the KYT individual

277

278 Kolomyitsiv Yar Tract human osteological specimen was directly dated to 5170±30 BP (Table 1).

279 After calibration, this corresponds to 4049-3820 calBCE (95.4% probability). Thus, radiocarbon

280 analysis confirms the placement of the specimen within the Trypillian BI-BII period.

281

282 **Table 1.** Isotope data of the Kolomyitsiv Yar Tract samples.

283

| Sample      | Date, uncalBP (lab code) | Date, calBCE, 95.4% probability        | $\delta^{13}\text{C}$ (‰) | %C   | $\delta^{15}\text{N}$ (‰) | %N    | C:N ratio | $87\text{Sr}/86\text{Sr}$ | $87\text{Sr}/86\text{Sr}$ 2se |
|-------------|--------------------------|----------------------------------------|---------------------------|------|---------------------------|-------|-----------|---------------------------|-------------------------------|
| Human bone  | 5170±30 (Beta – 523816)  | 4049-3945 (94.7%);<br>3831-3820 (0.8%) | -20.1                     | 42.1 | 12                        | 15.01 | 3.1       | 0.71109                   | 0.00001                       |
| Buried soil |                          |                                        |                           |      |                           |       |           | 0.73320                   | 0.00001                       |

284

285 The  $\delta^{15}\text{N}$  of 12.0‰ suggests the potential presence of Freshwater Reservoir Effect (FRE) from  
286 aquatic dietary sources (Lillie *et al.* 2009, 2011). The  $\delta^{15}\text{N}$  terrestrial baseline is between 9.5 and

287 11‰. Past 11.5‰, the FRE can influence the date up to 200 years (M.C. Lillie, personal

288 communication, 2021). Considering the  $\delta^{15}\text{N}$  of the KYT specimen being just over the terrestrial

289 baseline threshold, the FRE influence on the date is likely at the lower end of the FRE influence

290 scale. It is not possible to quantify the FRE more precisely in the absence of contemporaneous

291 faunal remains.

292

293 Stable isotope values of the KYT specimen were plotted against the corresponding values from

294 Ukrainian Neolithic, Eneolithic and Early Bronze Age populations for which stable isotope data

295 are currently available (Figure 3, Table S1). Kolomyitsiv Yar values for both  $\delta^{13}\text{C}$  and  $\delta^{15}\text{N}$  were  
296 outside of the range of variation of the Trypillian farming groups from Verteba Cave (Lillie *et al.*  
297 2018) and Prydnistryanske of the Yampil complex (Goslar *et al.* 2017).

298

299 Carbon and nitrogen stable isotope ratios of the KYT specimen were comparable with diet  
300 isotope ratios of the North Pontic steppe groups. Nitrogen  $\delta^{15}\text{N}$  ratios of KYT were within the  
301 range of variation of the Eneolithic-EBA Pontic steppe pastoralists, Eneolithic forager  
302 pastoralists from the Sredny Stog horizon, as well as the Dnipro Valley fishers, at the lower  
303 range of  $\delta^{15}\text{N}$  ratio variation for the latter group (Figure 3). Carbon  $\delta^{13}\text{C}$  ratios of the KYT  
304 specimen were within the range of variation of the Dniester Delta Eneolithic population from  
305 the Usatovo site at Mayaki, with likely subsistence based on fishing and pastoralism, and  
306 outside the range of carbon ratio variation for steppe pastoralists. Overall, the KYT diet appears  
307 comparable to the diet of fisher-forager-pastoralists of the North Pontic steppe, but not to the  
308 diet of farmers of Eneolithic Pontic coast and adjacent forest steppe areas (Figure 3). Based on  
309 diet isotope values, we conclude that KYT comes from a population with the subsistence  
310 strategy based on foraging and/or pastoralism.

311

312 At the same time, we cannot exclude that the particular isotope ratios found in the KYT  
313 individual could be a result of some special diet. The diet of the KYT individual could also be  
314 reflecting a mixture of farming, pastoralist and foraging subsistence practices, if KYT were a  
315 forager living in a farming environment or vice versa.

316

317 The presence of Cucuteni C ceramic style at KYT suggests the interaction of the Trypillian  
318 population of KYT with and influence by Sredny Stog. The two most proximal to KYT Sredny Stog  
319 settlements on the right bank of the Dnipro River are Deriivka II and Molyukhiv Bugor (Figure  
320 1). The Sredny Stog layer at the Molyukhiv Bugor site is dated to 3951-3640 BCE (Lillie *et al.*  
321 2011). Radiocarbon dates from the Deriivka II settlement place it in 4436-3988 BCE (Lillie *et al.*  
322 2009). It has been suggested that the formation of culture groups of the Sredny Stog II period  
323 (according to D. Telegin's classification (Telegin 1973)), represented by settlements at

324 Molyukhiv Bugor and Deriivka II, was influenced by Trypillia (Telegin 1986; Rassamakin 1999;  
325 Kotova 2013). Archaeological evidence suggests that the Sredny Stog populations at Deriivka II  
326 and Molyukhiv Bugor practiced agriculture, but their main form of subsistence was hunting and  
327 pastoralism, supplemented by freshwater fish and mollusks (Telegin 1973, 1986; Lillie *et al.*  
328 2009; Kotova 2013; Mileto *et al.* 2017). The presence of Sredny Stog groups in the forest steppe  
329 zone indicates the movement of Sredny Stog northward during the Srednij Stog II period.

330

### 331 Strontium isotope analysis

332

333 The  $^{87}\text{Sr}/^{86}\text{Sr}$  ratio value measured in the KYT bone specimen was 0.71109 and the one  
334 measured in the buried soil was 0.73320 (Table 2). No samples were collected to define a  
335 strontium isotopic baseline for the purpose of the present study. The strontium isotopic  
336 composition of the bone and soil samples were compared to data from (Ventresca Miller *et al.*  
337 2021) for estimated values of the  $^{87}\text{Sr}/^{86}\text{Sr}$  ratio values across the different geological ages in  
338 Ukraine. These estimations were derived from values presented in (Voerkelius *et al.* 2010). The  
339 geological setting of the KYT site and the adjacent stream is mainly composed of sedimentary  
340 rocks and sediments from the Eocene, Oligocene and Miocene, with estimated range of  
341  $^{87}\text{Sr}/^{86}\text{Sr}$  ratio values between 0.709 and 0.711 (Ventresca Miller *et al.* 2021). Rocks of  
342 Precambrian age with estimated range of values  $^{87}\text{Sr}/^{86}\text{Sr}$  ratio values between 0.712 and 0.780  
343 (Ventresca Miller *et al.* 2021) can be found West and South within a range of 35-45 km from the  
344 KYT site. The lithologies around the KYT site are presented in detail in Figure S5.

345

346 The  $^{87}\text{Sr}/^{86}\text{Sr}$  ratio value of the soil sample (0.73320) is higher than the range proposed for the  
347 Cenozoic substrate present at the KYT site. No strontium isotopic data on the specific lithologies  
348 developed at the site is available, which makes it difficult to assess whether the soil is  
349 representative of the substrate or if strontium from another source has contaminated the soil.  
350 The site itself, and the area drained by the adjacent stream, are not currently farmed, but  
351 agriculture is common in the region and the application of fertilizers is likely. Numerous studies  
352 have demonstrated the impact of modern fertilizers on the strontium isotopic signature of soils

353 (e.g., (Antich *et al.* 2000; Böhlke & Horan 2000; Lottermoser 2009) and archaeological remains  
354 buried in these soils (e.g., (Bentley 2006). Available data for the strontium isotopic composition  
355 of fertilizers exhibit lower values than that of the soil sample from KYT (e.g., (Antich *et al.* 2000;  
356 Böhlke & Horan 2000; Vitòria *et al.* 2004). However, some data for K-fertilizers also  
357 demonstrates that they can present much higher values (e.g., (Borg & Banner 1996; Böhlke &  
358 Horan 2000). Additional data, including the identification of the types of fertilizers used in the  
359 region, would be required to determine if the Sr isotopic signature from the KYT soil has been  
360 affected by the use of K-fertilizers. No older rock of Proterozoic or Archean age with higher  
361 strontium ratio value is present along the stream adjacent to the site (Figure S4), and all  
362 lithologies around the site are of Cenozoic age and exhibit lower Sr ratio values than the soil  
363 sample. Further sampling around the site would be needed to define the strontium isotopic  
364 signature of the site and its immediate surroundings.

365

366 The KYT bone sample  $^{87}\text{Sr}/^{86}\text{Sr}$  ratio value is slightly higher than the range of estimated values  
367 for the Cenozoic substrates. The signature in the bone could be the result of a mixture of  
368 Cenozoic substrates with an input from Precambrian rocks that present higher strontium ratio  
369 values. This would be consistent with the diet of a forager-pastoralist who would get their food  
370 from the area of Precambrian rocks to the South and West from the KYT site. However, these  
371 substrates, and regions where they can be found in association, have a broad distribution,  
372 which prevents precise association of the KYT bone specimen with a specific area or site.

373

374 The bone sample's strontium ratio was also compared to the signature obtained from human  
375 enamel from individuals of the Eneolithic and Yamna populations of Ukraine (Gerling 2015;  
376 Ventresca Miller *et al.* 2021). The KYT individual's strontium ratio falls within the range of  
377 values observed for the site of Sugokleya (Kirovograd Region), which is associated with the  
378 Yamna culture (Gerling 2015). More specifically, the KYT bone's strontium ratio is close in value  
379 to that from the enamel of an individual found at the Sugokleya Kurgan Grave 10 (UK 44/45,  
380 (Gerling 2015)). The Sugokleya site is located in the vicinity of Deriivka II settlement of the  
381 Sredny Stog culture, making that area a plausible place of origin of the KYT individual. The

382 present data, however, do not allow to unequivocally identify the place of origin of the KYT  
383 individual nor to firmly establish whether the individual was non-local to the KYT site.

384

385 The fact that bone is a porous tissue and its biogenic strontium signature is commonly affected  
386 by diagenesis/chemical exchanges within the burial environment has consequences for this  
387 research. Because the soil in immediate contact with the bone is higher than that of the bone, it  
388 is possible that the value of the bone was originally lower than the value that was measured.

389

390 Taken together, diet isotope analysis of the KYT individual suggests the forager-pastoralist  
391 subsistence type such as that of forest-steppe Sredny Stog communities of the middle Dnipro  
392 Valley. Strontium isotopic signature of the KYT individual is compatible with a large geographic  
393 area, encompassing most of the Middle Dnipro Valley, and close to the strontium isotope ratios  
394 in the vicinity of the Deriivka II settlement of Sredny Stog (Figure 1). The presence of Cucuteni C  
395 pottery at the KYT site pointing at the presence of Sredny Stog pottery makers at KYT (Videiko &  
396 Burdo 2018) and the similarity of ceramic assemblages between KYT and Sredny Stog, further  
397 support the origin of the KYT individual from a Sredny Stog population.

398

#### 399 Genetic analysis of the KYT specimen

400

401 To examine the genetic ancestry of the KYT individual, we extracted and examined the KYT  
402 individual's DNA. Genetic analysis revealed that the individual was a female, carrying mtDNA  
403 haplogroup U4b1b2 (Table 2). Carriers of the U4b subclade were identified in Mesolithic and  
404 Neolithic fishers and foragers from Ukraine, the Iron Gates area of the Danube, and the Baltic  
405 coast (Mathieson *et al.* 2018). The U4 mtDNA clade was present in the Middle Dnipro Valley  
406 from the beginning of the Holocene and persisted in the North Pontic steppe through at least  
407 the late Eneolithic (Nikitin *et al.* 2017a; Mathieson *et al.* 2018; Allentoft *et al.* 2022; Mattila *et*  
408 *al.* 2022). Carriers of the U4b mtDNA lineage have not been identified in Trypillian remains  
409 studied to date. At the same time, a late Trypillian individual dated to 3482-3297 calBCE from  
410 the Gordinești site in Moldova and identified as having a substantial "steppe" genetic

411 admixture carried a U4-derived mitochondrial lineage U4a1 (Immel *et al.* 2020). On the whole-  
412 genome Principal Component Analysis (PCA), the Gordinești individual is pulled away from the  
413 cluster of Trypillian specimens from Verteba cave, dated to ca. 3900-3600 calBCE, towards the  
414 EBA Yamna individuals from Ukraine and the Volga River region.

415  
416 Whole genome analysis of the KYT specimen produced 76550 Single Nucleotide Polymorphism  
417 (SNP) “hits” covering 6.8% of total autosomal targets (Tables 2, S2). We produced a PCA  
418 projection of ancient and modern west Eurasian genomes that included the KYT specimen  
419 (Figure 4). Many ancient samples fall outside the genetic range of modern Eurasia. The KYT  
420 sample (marked as SSX in Figure 3) falls close to Yamna pastoralists of the EBA. KYT-SSX has  
421 more ancestry from the ancient steppe than any modern West Eurasian sample, but is very  
422 distinct from Mesolithic-Neolithic hunter-gatherers, either Eastern Hunter Gatherers (EHG) or  
423 even more so samples from the Mesolithic in Serbia (Iron Gates) which are genetically primarily  
424 of Western Hunter Gatherer (WHG)-associated ancestry.

425  
426 While the KYT-SSX specimen clusters most closely with Yamna, both from Ukraine (Shevchenko)  
427 and Russia (Middle Volga, Samara Region), it does not form a clade with the Yamna. An  $f_4$  test  
428 (Patterson *et al.* 2012) for  $f_4$  (*Ancient African genomes, Serbia Mesolithic; SSX, Ukraine EBA*  
429 *Yamnaya*) produced a Z score of  $-3.85$ , and for Samara Yamna instead of KYT-SSX  $Z = -4.78$ .  
430 Statistical analysis of whole-genome data further revealed that KYT-SSX was not genetically  
431 similar to Trypillia individuals studied to date. Thus, for example, for  $f_4$  (*Old Africa, Turkey*  
432 *Neolithic; SSX, Trypillia*) the Z-score is  $6.692$ . A plausible scenario is that the KYT individual has  
433 much of their ancestry from a Proto-Yamna population (Chintalapati *et al.* 2022), while also  
434 being admixed with Serbia/Iron Gates Mesolithic, the latter possibly coming from the Neolithic  
435 populations of the Dnipro Valley that have been shown to carry WHG admixture (Mathieson *et*  
436 *al.* 2018). Sredny Stog is the main Proto-Yamna group of the Eneolithic North Pontic steppe and  
437 has been hypothesized to be ancestral to Yamna based on archaeological analysis (Telegin  
438 1986), which would be consistent with the assignment of the KYT individual to deriving most of  
439 its ancestry from Sredny Stog people.



440 **Table 2.** Genomic data of the Kolomiysiv Yar Tract sample. Full DNA library report is presented  
441 in Table S2.

442

| Specimen/DNA lab code  | Molecular sex | MtDNA haplotype | SNP hits on autosomal targets | Coverage on autosomal targets |
|------------------------|---------------|-----------------|-------------------------------|-------------------------------|
| Human long bone /I7585 | Female        | U4b1b2          | 76612                         | 0.068193                      |

443

444 The presence of an individual with Yamna-related ancestry, most plausibly derived from Sredny  
445 Stog groups, at the Trypillian KYT site proposes a possibility of genetic interactions between the  
446 steppe and farming worlds as early as the late 5<sup>th</sup> – early 4<sup>th</sup> millennium BCE. However,  
447 evidence for such interactions is currently lacking. As mentioned above, Trypillians studied to  
448 date did not carry steppe genetic admixture until after 3482-3297 calBCE. At the same time,  
449 details about Trypillian ancestry of the first part of the 4<sup>th</sup> millennium come from a single site  
450 (Verteba Cave) and a limited number of specimens. Nevertheless, the widespread presence of  
451 Cucuteni C pottery at Trypillian sites of the early-middle period, including Verteba, suggests the  
452 Sredny Stog-Trypilla interactions were extensive, thus providing multiple opportunities for  
453 biological interactions between the two culture groups as well. Further examination of  
454 genomes from Sredny Stog and Trypilla sites would help clarify the timing of genetic  
455 interactions between Trypillians and Eneolithic steppe forager-pastoralists.

456

457 In conclusion, the archaeological, stable isotope and genetic analyses presented in this report  
458 produce the following life history highlights for the KYT individual. While the bone fragment of  
459 the KYT individual was found in Trypilla culture context, the individual was not genetically  
460 associated with the ancestral pool of European Neolithic farmers from which Trypillian ancestry  
461 is derived. The KYT individual, genetically a female, is a representative of a Proto-Yamna  
462 population of Eneolithic forager-pastoralists of the North Pontic area, such as Sredny Stog. The  
463 individual's maternal (mtDNA) lineage stems from an autochthonous to the North Pontic area

464 clade, which was present in the Dnipro Valley since the beginning of the Holocene. The  
465 individual's diet was consistent with that of a forager-pastoralist, or the individual had a mixed  
466 diet, potentially including resources coming from foraging, pastoralism and farming. The origin  
467 of the KYT individual is likely in the middle Dnipro Valley, plausibly from a location in the vicinity  
468 of the Deriivka II settlement of Sredny Stog.

469  
470 Integrating the data presented in this report with the existing body of archaeological knowledge  
471 presents the following picture of the population dynamics at the end of the 5<sup>th</sup> millennium in  
472 the East Balkans - North Pontic area. Archaeological evidence indicates the existence of  
473 contacts between Sredny Stog, PCCTC and the KGK communities of West Pontic from before  
474 4700-4600 BCE through ca. 4200 BCE, during the operation of the Eneolithic Circum-Pontic  
475 trade network (Nikitin & Ivanova 2022). The spread of ceramic finds and copper products allows  
476 us to reconstruct the trade route from the western part of KGK culture complex in the Lower  
477 Danube Valley (the Pietrele site in Romania, Figure 1) to the Bugeac steppe in the northwest  
478 Pontic (e.g. the site of Suvorovo, Figure 1), following north-east to the Middle Dniester PCCTC  
479 groups of the Solonceni-Zalischyky type, and then further east to the Dnipro River. Imports of  
480 Trypillia BI ceramics at the settlement of Sredny Stog and other archaeological sites in the  
481 Lower Dnipro Valley including Mariupol-type cemeteries such as Mykil's'ke (Nikolskoye) (Figure  
482 1) testify to the extent of these trade connections to the Dnipro Rapids area. This trade route  
483 operated for more than 500 years (Videiko 2018). After 4200 BCE, following the collapse of the  
484 Balkan Eneolithic in the result of climatic changes (Nikitin & Ivanova 2022) that also affected  
485 the steppe belt north of the Black Sea, the Sredny Stog populations moved from the steppe to  
486 forest steppe along the Middle Dnipro Valley, where they came into direct contact with PCCTC.  
487 This contact is evidenced by the spread of Cucuteni C ceramics, patterned after the steppe  
488 ceramics, in Trypillian settlements. It has been suggested that the Cucuteni C ceramic style  
489 manifests the presence of the bearers of steppe ceramic technology at Trypillian settlements  
490 (Videiko & Burdo 2018). The population affiliation of the KYT individual with Proto-  
491 Yamna/Sredny Stog and the presence at KYT of Cucuteni C ceramics made on site not only  
492 confirms the presence of Sredny Stog at Trypillian sites, but also reflects the integration of

493 steppe individuals into Trypillian societies. This study exemplifies a case when the hypotheses  
494 of archaeologists, based on the use of traditional typological and comparative methods,  
495 received strong validation from molecular analysis methods employed by natural sciences.

496

## 497 **Acknowledgements**

498

499 The authors would like to thank Nadin Rohland, Swapan Mallick, Matthew Mah, Adam Micco,  
500 and Aisling Kearns for their skillful preparation and processing of the sample for ancient DNA  
501 analysis. This study was supported, in part, by Professional Development Funds from the  
502 College of Liberal Arts and Sciences of Grand Valley State University to AGN and by the Howard  
503 Hughes Medical Institute (HHMI) to DR. The acquisition of the Nu Plasma II MC-ICP-MS was  
504 funded by the National Science Foundation (grant #BCS-0922374). The Archaeometry  
505 Laboratory is supported by the National Science Foundation (grant #BCS-1912776). This article  
506 is subject to the HHMI's Open Access to Publications policy. HHMI lab heads have previously  
507 granted a nonexclusive CC BY 4.0 license to the public and a sublicensable license to HHMI in  
508 their research articles. Pursuant to those licenses, the author-accepted manuscript of this  
509 article can be made freely available under a CC BY 4.0 license immediately upon publication.

510

## 511 **References**

512

513 ALLENTOFT, M.E. et al. 2022. Population Genomics of Stone Age Eurasia. *bioRxiv*,  
514 2022.05.04.490594.

515 <http://biorxiv.org/content/early/2022/09/27/2022.05.04.490594.abstract>.

516 <https://doi.org/10.1101/2022.05.04.490594>.

517 ANTICH, N., A. CANALS, A. SOLER, D.P.F. DARBYSHIRE & B.F. SPIRO. 2000. The isotope composition of  
518 dissolved strontium as a tracer of pollution in the Llobregat River, northeast Spain, in A.  
519 Dassargues (ed.) *Tracers and Modelling in Hydrogeology*, 262: 207–12. Oxfordshire, UK:  
520 International Association of Hydrological Sciences Press.

- 521 BENTLEY, R.A. 2006. Strontium Isotopes from the Earth to the Archaeological Skeleton: A Review.  
522 *Journal of Archaeological Method and Theory* 13: 135–87.  
523 <https://doi.org/10.1007/s10816-006-9009-x>.
- 524 BÖHLKE, J.K. & M. HORAN. 2000. Strontium isotope geochemistry of groundwaters and streams  
525 affected by agriculture, Locust Grove, MD. *Applied Geochemistry* 15: 599–609.  
526 [https://doi.org/10.1016/S0883-2927\(99\)00075-X](https://doi.org/10.1016/S0883-2927(99)00075-X).
- 527 BORG, L.E. & J.L. BANNER. 1996. Neodymium and strontium isotopic constraints on soil sources in  
528 Barbados, West Indies. *Geochimica et Cosmochimica Acta* 60: 4193–4206.  
529 [https://doi.org/10.1016/S0016-7037\(96\)00252-9](https://doi.org/10.1016/S0016-7037(96)00252-9).
- 530 BRONK RAMSEY, C. 2009. Bayesian Analysis of Radiocarbon Dates. *Radiocarbon* 51: 337–60.  
531 [https://www.cambridge.org/core/product/identifier/S0033822200033865/type/journal\\_a](https://www.cambridge.org/core/product/identifier/S0033822200033865/type/journal_article)  
532 [rticle. https://doi.org/10.1017/S0033822200033865](https://doi.org/10.1017/S0033822200033865).
- 533 BURDO, N.B. 2002. Kul'turno-istoricheskiye kontakty ranne-tripol'skikh plemen, in E. v. Yarovoy  
534 (ed.) *Drevneyshiy obshchnosti zemledel'tsev i skotovodov Severnogo Prichernomor'ya (V*  
535 *tys. do n.e. — V vek n.e.)*: 49–51. Tiraspol': Nauchno-issledovatel'skaya laboratoriya  
536 «Arkheologiya» PGU im. T.G. Shevchenko.
- 537 —. 2004. Pokhodzhennya Trypil's'koi kul'tury, in M.Y. Videiko, N.B. Burdo & S. Lyashko (ed.)  
538 *Encyclopediya Trypil's'koi Kul'tury*, 1: 96–109. Kyiv: Ukrpolygraphmedia.
- 539 BURDO, N.B. 2016. The Cucuteni C pottery in the Cucuteni-Trypillia cultural complex  
540 (Formulation of the problem and a brief historiography) - Керамика «типа Кукутень С» в  
541 керамических ансамблях культурного комплекса Кукутень-Триполье (Постановка  
542 проблемы и краткая историог. *Tyragetia X [XXV]*: 7–38.
- 543 CHINTALAPATI, M., N. PATTERSON & P. MOORJANI. 2022. The spatiotemporal patterns of major  
544 human admixture events during the European Holocene. *eLife* 11.  
545 <https://elifesciences.org/articles/77625>. <https://doi.org/10.7554/eLife.77625>.
- 546 DABNEY, J. et al. 2013. Complete mitochondrial genome sequence of a Middle Pleistocene cave  
547 bear reconstructed from ultrashort DNA fragments. *Proceedings of the National Academy*  
548 *of Sciences* 110: 15758–63. <http://www.pnas.org/cgi/doi/10.1073/pnas.1314445110>.  
549 <https://doi.org/10.1073/pnas.1314445110>.

- 550 DE MUYNCK, D., G. HUELGA-SUAREZ, L. VAN HEGHE, P. DEGRYSE & F. VANHAECKE. 2009. Systematic  
551 evaluation of a strontium-specific extraction chromatographic resin for obtaining a purified  
552 Sr fraction with quantitative recovery from complex and Ca-rich matrices. *Journal of*  
553 *Analytical Atomic Spectrometry* 24: 1498. <https://doi.org/10.1039/b908645e>.
- 554 FU, Q. et al. 2013. A revised timescale for human evolution based on ancient mitochondrial  
555 genomes. *Current Biology* 23: 553–59. <https://doi.org/10.1016/j.cub.2013.02.044>.
- 556 —. 2015. An early modern human from Romania with a recent Neanderthal ancestor. *Nature*  
557 524: 216–19. <http://www.nature.com/nature/journal/v524/n7564/abs/nature14558.html>.  
558 <https://doi.org/10.1038/nature14558>.
- 559 GERLING, C. 2015. *Prehistoric Mobility and Diet in the West Eurasian Steppes 3500 to 300 BC: An*  
560 *Isotopic Approach*. De Gruyter. <https://doi.org/10.1515/9783110311211>.  
561 <https://doi.org/doi:10.1515/9783110311211>.
- 562 GOSLAR, T., M. JANKOWSKI, A. KOŚKO, M. LITYŃSKA-ZAJĄC, P. WŁODARCZAK & D. ŻURKIEWICZ. 2017.  
563 Builders and Users of Ritual Centres, Yampil Barrow Complex: Studies of Diet Based on  
564 Stable Carbon and Nitrogen Isotope Composition. *Baltic-Pontic Studies* 22: 91–125.  
565 <https://content.sciendo.com/view/journals/bps/22/1/article-p91.xml>.  
566 <https://doi.org/10.1515/bps-2017-0023>.
- 567 IMMEL, A. et al. 2020. Gene-flow from steppe individuals into Cucuteni-Trypillia associated  
568 populations indicates long-standing contacts and gradual admixture. *Scientific Reports* 10:  
569 4253. <http://www.nature.com/articles/s41598-020-61190-0>.  
570 <https://doi.org/10.1038/s41598-020-61190-0>.
- 571 KORLEVIĆ, P., T. GERBER, M.-T. GANSAUGE, M. HAJDINJAK, S. NAGEL, A. AXIMU-PETRI & M. MEYER. 2015.  
572 Reducing microbial and human contamination in DNA extractions from ancient bones and  
573 teeth. *BioTechniques* 59.  
574 [http://www.biotechniques.com/BiotechniquesJournal/2015/August/Reducing-microbial-](http://www.biotechniques.com/BiotechniquesJournal/2015/August/Reducing-microbial-and-human-contamination-in-DNA-extractions-from-ancient---bones-and-teeth/biotechniques-359887.html)  
575 [and-human-contamination-in-DNA-extractions-from-ancient---bones-and-](http://www.biotechniques.com/BiotechniquesJournal/2015/August/Reducing-microbial-and-human-contamination-in-DNA-extractions-from-ancient---bones-and-teeth/biotechniques-359887.html)  
576 [teeth/biotechniques-359887.html](http://www.biotechniques.com/BiotechniquesJournal/2015/August/Reducing-microbial-and-human-contamination-in-DNA-extractions-from-ancient---bones-and-teeth/biotechniques-359887.html). <https://doi.org/10.2144/000114320>.
- 577 KOTOVA, N.S. 2013. *Dereivskaya kul'tura i pamyatniki Nizhnemikhaylovskogo tipa*. Kiev, Kharkov:  
578 Maidan.

- 579 KVITNITSKIY, M. v. 2006. Novi pam'yatky trypil's'koyi kul'tury na Kyivshchyni, in *Okhorona*  
580 *kul'turnoyi spadshchyny Kyivivs'koyi oblasti*: 29–42. Kyiv: Akadempriodyka.
- 581 LILLIE, M., C. BUDD, I. POTEKHINA & R. HEDGES. 2009. The radiocarbon reservoir effect: new  
582 evidence from the cemeteries of the middle and lower Dnieper basin, Ukraine. *Journal of*  
583 *Archaeological Science* 36: 256–64.  
584 <http://linkinghub.elsevier.com/retrieve/pii/S0305440308002057>.  
585 <https://doi.org/10.1016/j.jas.2008.09.005>.
- 586 LILLIE, M., C. BUDD & I. POTEKHINA. 2011. Stable isotope analysis of prehistoric populations from  
587 the cemeteries of the Middle and Lower Dnieper Basin, Ukraine. *Journal of Archaeological*  
588 *Science* 38: 57–68. <https://linkinghub.elsevier.com/retrieve/pii/S0305440310002852>.  
589 <https://doi.org/10.1016/j.jas.2010.08.010>.
- 590 LILLIE, M.C., C.E. BUDD, I.D. POTEKHINA, D. PRICE, M. SOKHATSKY & A.G. NIKITIN. 2018. First isotope  
591 analysis and new radiocarbon dating of Trypillia (Tripolye) farmers from Verteba Cave,  
592 Bilche Zolote, Ukraine. *Documenta Praehistorica* 44: 306. [https://revije.ff.uni-](https://revije.ff.uni-lj.si/DocumentaPraehistorica/article/view/44.18)  
593 [lj.si/DocumentaPraehistorica/article/view/44.18](https://revije.ff.uni-lj.si/DocumentaPraehistorica/article/view/44.18). <https://doi.org/10.4312/dp.44.18>.
- 594 LONGIN, R. 1971. New Method of Collagen Extraction for Radiocarbon Dating. *Nature* 230: 241–  
595 42. <https://doi.org/10.1038/230241a0>. <https://doi.org/10.1038/230241a0>.
- 596 LOTTERMOSER, B.G. 2009. Trace metal enrichment in sugarcane soils due to the long-term  
597 application of fertilisers, North Queensland, Australia: geochemical and Pb, Sr, and U  
598 isotopic compositions. *Soil Research* 47: 311. <https://doi.org/10.1071/SR06178>.
- 599 MATHIESON, I. et al. 2015. Genome-wide patterns of selection in 230 ancient Eurasians. *Nature*  
600 528. Nature Publishing Group: 499–503.  
601 <http://www.nature.com/doi/10.1038/nature16152>.  
602 <https://doi.org/10.1038/nature16152>.
- 603 —. 2018. The genomic history of southeastern Europe. *Nature* 555: 197–203.  
604 <http://www.nature.com/doi/10.1038/nature25778>.  
605 <https://doi.org/10.1038/nature25778>.

- 606 MATTILA, T. et al. 2022. Genetic continuity, isolation, and gene flow in Stone Age Central and  
607 Eastern Europe. *Research Square* . <https://doi.org/https://doi.org/10.21203/rs.3.rs-1966812/v1>.
- 608
- 609 MILETO, S., E. KAISER, Y. RASSAMAKIN & R.P. EVERSHERD. 2017. New insights into the subsistence  
610 economy of the Eneolithic Dereivka culture of the Ukrainian North-Pontic region through  
611 lipid residues analysis of pottery vessels. *Journal of Archaeological Science: Reports* 13: 67–  
612 74. <https://linkinghub.elsevier.com/retrieve/pii/S2352409X16305934>.  
613 <https://doi.org/10.1016/j.jasrep.2017.03.028>.
- 614 NIKITIN, A.G. & S. IVANOVA. 2022. Long-distance exchanges along the Black Sea coast in the  
615 Eneolithic and the “steppe” genetic ancestry problem. *Archaeolingua*, In press.
- 616 NIKITIN, A.G., M.P. SOKHATSKY, M.M. KOVALIUKH & M.Y. VIDEIKO. 2010. Comprehensive Site  
617 Chronology and Ancient Mitochondrial DNA Analysis from Verteba Cave – a Trypillian  
618 Culture Site of Eneolithic Ukraine. *Interdisciplinaria Archaeologica. Natural Sciences in  
619 Archaeology*. 1: 9–18. <http://www.iansa.eu/papers/IANSA-2010-01-02-nikitin.html>.
- 620 NIKITIN, A.G., S. IVANOVA, D. KIOSAK, J. BADGEROW & J. PASHNICK. 2017a. Subdivisions of haplogroups  
621 U and C encompass mitochondrial DNA lineages of Eneolithic–Early Bronze Age Kurgan  
622 populations of western North Pontic steppe. *Journal of Human Genetics*.  
623 <http://www.nature.com/doi/10.1038/jhg.2017.12>.  
624 <https://doi.org/10.1038/jhg.2017.12>.
- 625 NIKITIN, A.G., I. POTEKHINA, N. ROHLAND, S. MALLICK, D. REICH & M. LILLIE. 2017b. Mitochondrial DNA  
626 analysis of Eneolithic Trypillians from Ukraine reveals Neolithic farming genetic roots.  
627 (ed.)C. Capelli *PLOS ONE* 12: e0172952. <http://dx.plos.org/10.1371/journal.pone.0172952>.  
628 <https://doi.org/10.1371/journal.pone.0172952>.
- 629 PATTERSON, N., P. MOORJANI, Y. LUO, S. MALLICK, N. ROHLAND, Y. ZHAN, T. GENSCHORECK, T. WEBSTER &  
630 D. REICH. 2012. Ancient Admixture in Human History. *Genetics* 192: 1065–93.  
631 <https://doi.org/10.1534/genetics.112.145037>.
- 632 RASSAMAKIN, Y.Y. 1999. The Eneolithic of the Black Sea Steppe: Dynamics of Cultural and  
633 Economic Development 4500–2300 BC, in M. Levine, Y. Rassamakin, A. Kislenko & N.

- 634 Tatarintseva (ed.) *Late Prehistoric Exploitation of the Eurasian Steppe*: 59–182. Cambridge:  
635 McDonald Institute Monographs.
- 636 REIMER, P.J. et al. 2020. The IntCal20 Northern Hemisphere Radiocarbon Age Calibration Curve  
637 (0–55 cal kBP). *Radiocarbon* 62: 725–57.  
638 [https://www.cambridge.org/core/product/identifier/S0033822220000417/type/journal\\_a](https://www.cambridge.org/core/product/identifier/S0033822220000417/type/journal_article)  
639 [rticle. https://doi.org/10.1017/RDC.2020.41](https://doi.org/10.1017/RDC.2020.41).
- 640 ROHLAND, N. & D. REICH. 2012. Cost-effective, high-throughput DNA sequencing libraries for  
641 multiplexed target capture. *Genome Research* 22: 939–46.  
642 <https://doi.org/10.1101/gr.128124.111>.
- 643 ROHLAND, N., I. GLOCKE, A. AXIMU-PETRI & M. MEYER. 2018. Extraction of highly degraded DNA from  
644 ancient bones, teeth and sediments for high-throughput sequencing. *Nature Protocols* 13:  
645 2447–61. <https://doi.org/10.1038/s41596-018-0050-5>.
- 646 ROHLAND, N., S. MALLICK, M. MAH, R. MAIER, N. PATTERSON & D. REICH. 2022. Three Reagents for in-  
647 Solution Enrichment of Ancient Human DNA at More than a Million SNPs. *bioRxiv*,  
648 2022.01.13.476259.  
649 <http://biorxiv.org/content/early/2022/01/15/2022.01.13.476259.abstract>.  
650 <https://doi.org/10.1101/2022.01.13.476259>.
- 651 SCHWARCZ, H.P. & M.J. SCHOENINGER. 1991. Stable isotope analyses in human nutritional ecology.  
652 *American Journal of Physical Anthropology* 34. John Wiley & Sons, Ltd: 283–321.  
653 <https://doi.org/10.1002/ajpa.1330340613>. <https://doi.org/10.1002/ajpa.1330340613>.
- 654 TELEGIN, D.Ya. 1973. *Seredn'ostohivs'ka kul'tura epokhy midi*. Kyiv: Naukova Dumka.  
655 —. 1986. *Dereivka. A Settlement and Cemetery of Copper Age Horse Keepers on the Middle*  
656 *Dnieper*. Oxford: British Archaeological Reports.
- 657 THIRLWALL, M.F. 1991. Long-term reproducibility of multicollector Sr and Nd isotope ratio  
658 analysis. *Chemical Geology: Isotope Geoscience section* 94: 85–104.  
659 [https://doi.org/10.1016/0168-9622\(91\)90002-E](https://doi.org/10.1016/0168-9622(91)90002-E).
- 660 TSVEK, E. v. & Y.Y. RASSAMAKIN. 2002. Miropolye, an Eastern-Tripolye settlement, and relative  
661 chronology of Sredniy Stog 2-type sites. *Stratum Plus* 2: 218–45.



- 662 VENTRESCA MILLER, A.R. et al. 2021. Re-evaluating Scythian lifeways: Isotopic analysis of diet and  
663 mobility in Iron Age Ukraine. *PLOS ONE* 16: e0245996.  
664 <https://doi.org/10.1371/journal.pone.0245996>.
- 665 VIDEIKO, M.Y. 2004. Periodyzatsyja Trypil'skoi kul'tury, in M.Y. Videiko, N.B. Burdo & S. Lyashko  
666 (ed.) *Encyclopediya Trypil's'koi Kul'tury*, 1: 78–83. Kyiv: Ukrpolygraphmedia.
- 667 —. 2012. Trypil's'ka kul'tura u Seredn'omu Podniprov'yi. *Pereyaslavika. Naukovi zapysky*.  
668 *Zbirnyk naukovykh statey* 5: 109–19.
- 669 —. 2018. Pivdenni shlyakhy obminu u V-IV tys. do n.e. *Narody y kul'tury Nyzhneho Dunaya v*  
670 *drevnosty*, 26–35.
- 671 VIDEIKO, M.Y. & N.B. BURDO. 2018. Life at the Eastern Frontiers of Old Europe. *Vita Antiqua* 10:  
672 135–45.
- 673 —. 2020. Trypillia from Dniester to Dnieper in the second half of the 5th mill. BC: farming  
674 colonization, invasions, migrations (possibilities of investigations) . *Tyragetia Tyragetia*,  
675 *s.n., XIV (1). c. 7-22. ISSN 1857-0240* 14: 7–22.
- 676 VIDEIKO, M.Y., N.B. BURDO & M.M. VIDEIKO. 2007. *Zvit pro doslidzhennya v ur. Kolomyitsiv Yar mizh*  
677 *s. Kopachiv ta Pershe Travnya Obukhivs'koho rayonu Kyiv's'koi oblasti 2006 roku*. Kyiv:  
678 Trypillia.
- 679 VIDEIKO, M.Y., M.M. VIDEIKO, E. SLIESARIEV & R. OHLRAU. 2017. New investigations at the Trypillia  
680 BI-II site of Kolomyitsiv Yar. *Tyragetia* 11: 55–66.
- 681 VITÒRIA, L., N. OTERO, A. SOLER & À. CANALS. 2004. Fertilizer Characterization: Isotopic Data (N, S,  
682 O, C, and Sr). *Environmental Science & Technology* 38: 3254–62.  
683 <https://doi.org/10.1021/es0348187>.
- 684 VOERKELIUS, S. et al. 2010. Strontium isotopic signatures of natural mineral waters, the reference  
685 to a simple geological map and its potential for authentication of food. *Food Chemistry*  
686 118: 933–40. <https://doi.org/10.1016/j.foodchem.2009.04.125>.
- 687

688 **Figure captions**

689

690 **Figure 1.** Location of the Kolomyiysiv Yar Tract, as well as Trypillia, Derrivka II, Molyukhiv Bugor,  
691 Sredny Stog, Stril'cha Skelya, Pietrele, Suvorovo, Solonceni and Mykil's'ke archaeological sites  
692 mentioned in the text. Image from <https://www.naturalearthdata.com/> (public domain),  
693 modified.

694

695 **Figure 2.** The Kolomyiysiv Yar Tract setting. Photo by M. Y. Videiko, 2006.

696

697 **Figure 3.** Distribution of  $\delta^{13}\text{C}$  and  $\delta^{15}\text{N}$  stable isotope ratios of Early Holocene-Bronze Age  
698 populations of the North and West Pontic area. Stable isotope ratios and corresponding  
699 publication sources are listed in Table S1. 1, Deriivka I, III; 2, Deriivka II; 3, Mykil's'ke; 4,  
700 Yasynuvatka; 5, Oleksandria; 6, Igren 8; 7, Molyukhiv Bugor; 8, 12, Mayaki; 9, 13, Pischanka; 10,  
701 Kam'yanka-Dniprovs'ka; 11, 17, Vinogradne; 14, Pidlisivka/Porohy; 15, Shakhta Stepna; 16,  
702 Sugokleya; 18, 19, Prydnistryanske; 20, Durankukak; 21, Smyadovo; 22, Varna; 23, Verteba  
703 Cave.

704

705 **Figure 4.** PCA projection of whole genome data of published West Eurasian prehistoric and  
706 modern (grey points) populations. Ukraine\_N, Ukrainian Neolithic; SSX, KYT specimen; EHG,  
707 Eastern Hunter Gatherers; Iran\_GanjDareh\_N, Iranian Neolithic; Turkey\_N, Anatolian Neolithic.

708

Figure 1

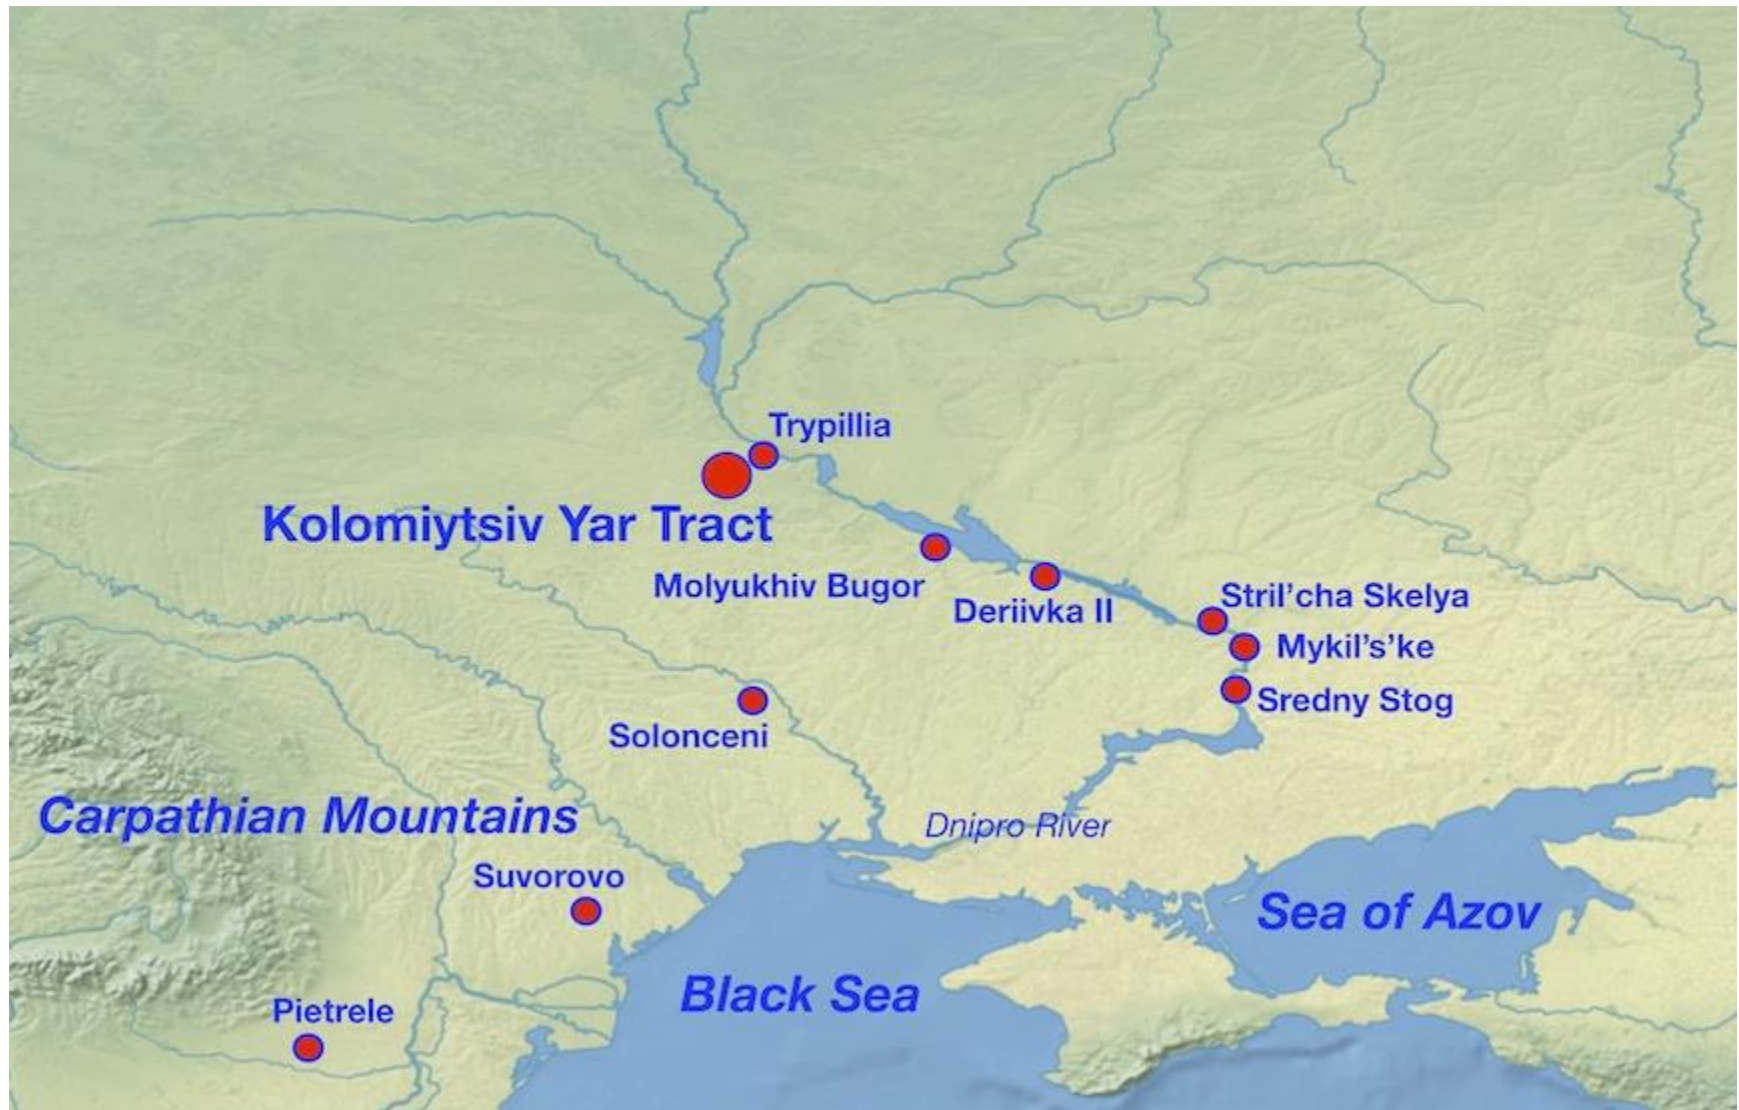

Figure 2

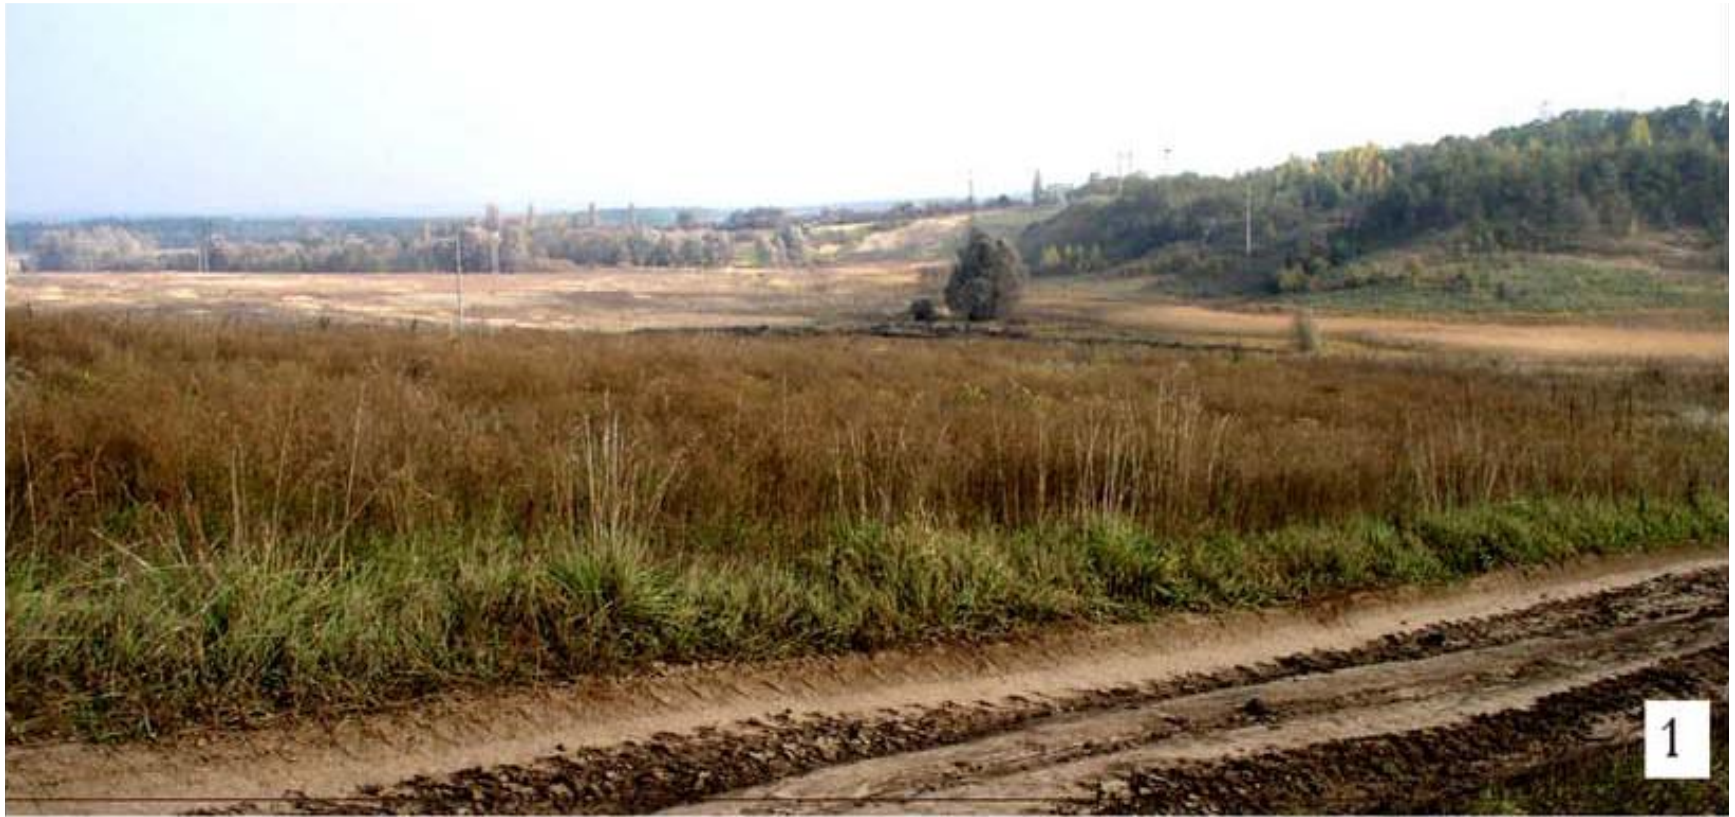

Figure 3

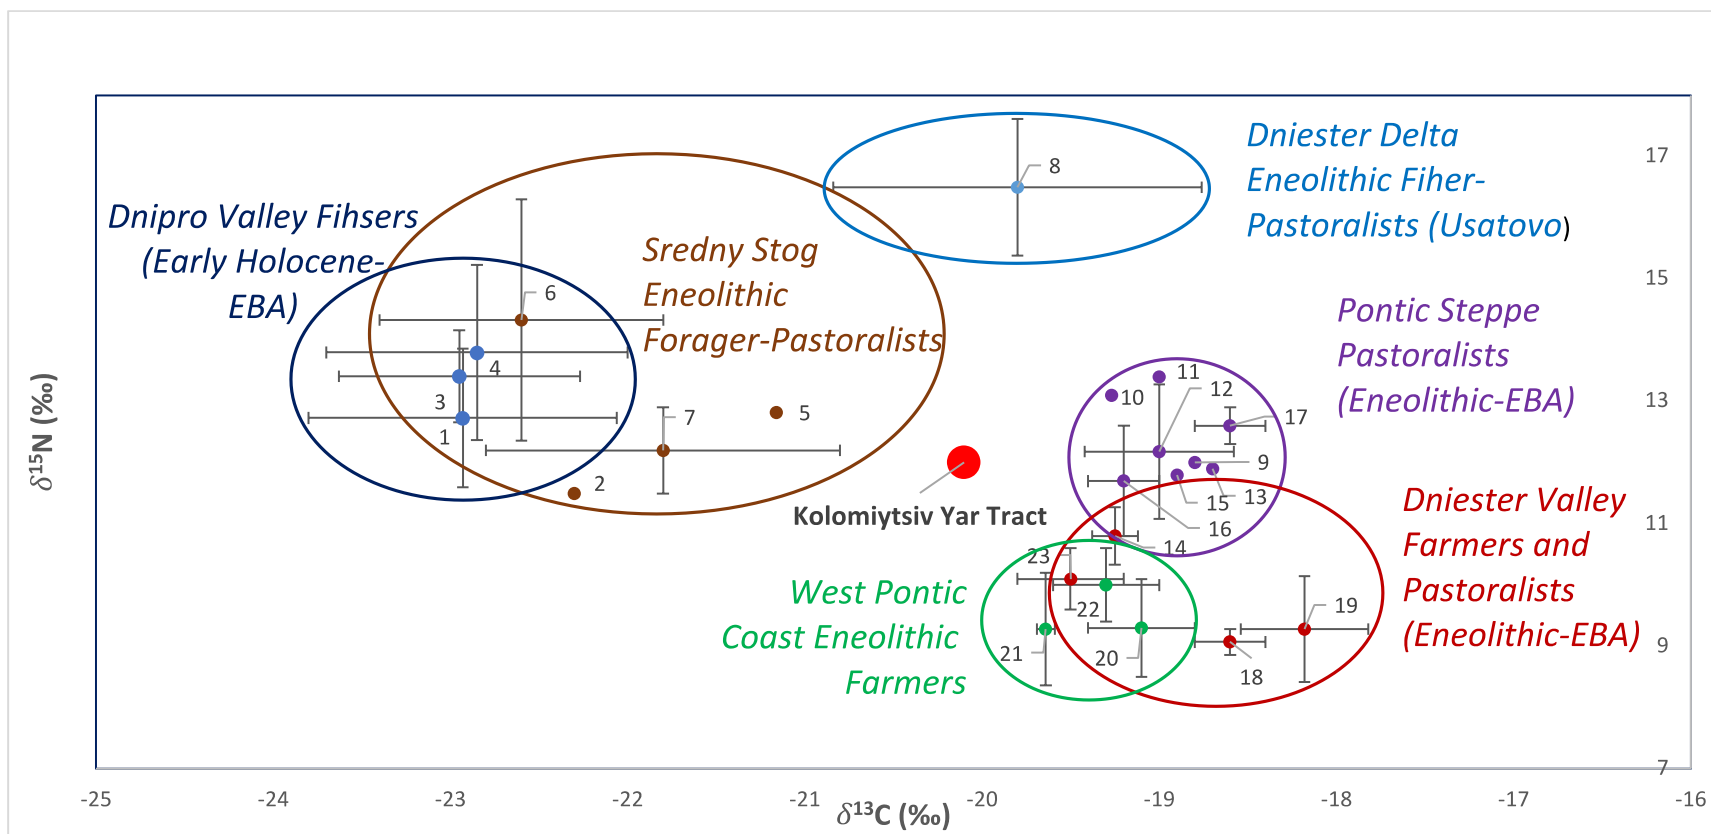

Figure 4

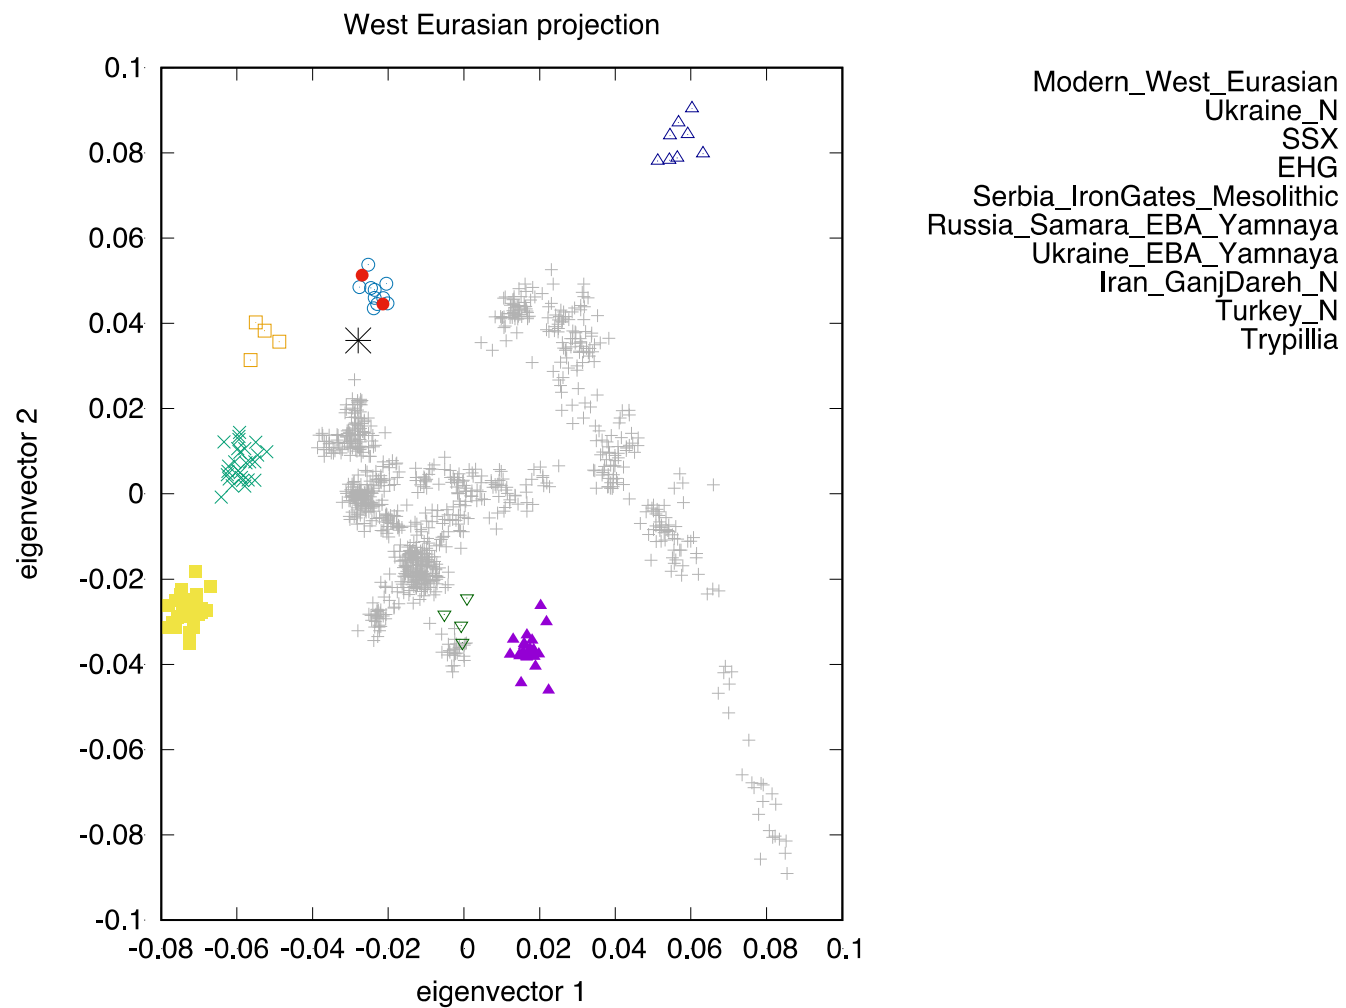

Source: https://www.biorxiv.org/content/10.1101/2022.10.31.514526v1.full.pdf
